# Supplementary material
Source: publisher site journal article supplement (http://www.kjim.org/upload/media/kjim-2022-198_suppl1.pdf)
Supplement: Supplementary file 1 [file kjim-2022-198_suppl1.pdf]

**Supplementary Table 1. Clinical characteristics compared by gender of the study population according to the STOP-BANG score**

| Characteristic                | STOP-BANG score |            |            |                |            |            |            |                |         |
|-------------------------------|-----------------|------------|------------|----------------|------------|------------|------------|----------------|---------|
|                               | Male            |            |            |                | Female     |            |            |                |         |
|                               | 0–2             | 3–4        | 5–8        | <i>p</i> value | 0–2        | 3–4        | 5–8        | <i>p</i> value |         |
| Number                        | 516             | 1,969      | 836        |                | 3,347      | 899        | 83         |                |         |
| Age groups, yr                |                 |            |            |                |            |            |            | < 0.001        | < 0.001 |
| 40–49                         | 66.5 (2.4)      | 26.8 (1.4) | 18.0 (1.6) |                | 35.1 (1.2) | 8.5 (1.2)  | 2.1 (1.5)  |                |         |
| 50–59                         | 12.7 (1.6)      | 33.9 (1.4) | 43.1 (2.1) |                | 30.6 (0.9) | 29.7 (2.1) | 43.6 (6.9) |                |         |
| 60–69                         | 12.2 (1.6)      | 23.3 (1.1) | 25.7 (1.8) |                | 19.9 (0.8) | 32.0 (1.8) | 34.7 (6.6) |                |         |
| 70–79                         | 6.0 (1.0)       | 12.3 (0.8) | 10.7 (1.0) |                | 10.8 (0.6) | 22.8 (1.7) | 14.1 (4.0) |                |         |
| ≥ 80                          | 2.6 (0.7)       | 3.6 (0.4)  | 2.5 (0.5)  |                | 3.7 (0.4)  | 7.1 (1.0)  | 5.5 (2.8)  |                |         |
| Educational level             |                 |            |            |                |            |            |            | < 0.001        | < 0.001 |
| Elementary school or lower    | 7.4 (1.2)       | 12.7 (1.0) | 9.8 (1.0)  |                | 18.8 (0.9) | 39.7 (2.0) | 33.8 (5.9) |                |         |
| Middle school                 | 6.8 (1.1)       | 11.9 (0.9) | 12.2 (1.4) |                | 10.6 (0.6) | 14.9 (1.4) | 14.6 (4.9) |                |         |
| High school                   | 30.9 (2.4)      | 35.6 (1.4) | 36.5 (2.0) |                | 37.3 (1.1) | 30.5 (2.1) | 30.3 (5.9) |                |         |
| College or higher             | 54.8 (2.6)      | 39.8 (1.7) | 41.5 (2.1) |                | 33.4 (1.3) | 14.9 (1.5) | 21.3 (5.9) |                |         |
| Household income              |                 |            |            |                |            |            |            | 0.016          | < 0.001 |
| Quintile 1 (lowest)           | 8.8 (1.5)       | 11.1 (0.9) | 11.3 (1.2) |                | 12.4 (0.8) | 23.3 (1.8) | 27.2 (5.5) |                |         |
| Quintile 2                    | 13.5 (1.7)      | 16.6 (1.0) | 17.2 (1.5) |                | 17.0 (0.8) | 24.2 (1.8) | 25.6 (6.0) |                |         |
| Quintile 3                    | 19.4 (2.1)      | 20.6 (1.1) | 20.3 (1.7) |                | 20.6 (0.9) | 19.2 (1.6) | 14.2 (3.6) |                |         |
| Quintile 4                    | 31.8 (2.6)      | 25.3 (1.2) | 20.8 (1.6) |                | 24.6 (0.9) | 20.8 (1.6) | 20.1 (5.8) |                |         |
| Quintile 5 (highest)          | 26.6 (2.6)      | 26.4 (1.5) | 30.4 (2.0) |                | 25.4 (1.2) | 12.4 (1.3) | 12.9 (4.1) |                |         |
| Region, urban                 | 70.1 (2.9)      | 70.0 (2.0) | 67.1 (2.5) | 0.456          | 72.0 (1.7) | 63.4 (2.6) | 73.5 (5.9) | < 0.001        |         |
| Occupation, yes               | 85.9 (1.7)      | 75.8 (1.1) | 77.3 (1.7) | < 0.001        | 53.6 (1.2) | 45.4 (2.2) | 37.9 (6.4) | < 0.001        |         |
| Smoking                       |                 |            |            |                |            |            |            | < 0.001        | 0.244   |
| Non                           | 26.7 (2.3)      | 20.3 (1.0) | 18.1 (1.5) |                | 92.4 (0.5) | 90.5 (1.2) | 90.9 (4.3) |                |         |
| Former                        | 36.3 (2.4)      | 48.5 (1.3) | 51.3 (2.0) |                | 4.1 (0.4)  | 4.4 (0.8)  | 7.4 (4.1)  |                |         |
| Current                       | 37.0 (2.7)      | 31.2 (1.3) | 30.7 (1.8) |                | 3.5 (0.4)  | 5.1 (0.9)  | 1.7 (1.7)  |                |         |
| Drinking                      |                 |            |            |                |            |            |            | 0.002          | 0.046   |
| Non                           | 16.7 (1.8)      | 20.5 (1.1) | 18.9 (1.6) |                | 39.4 (1.0) | 46.0 (2.0) | 42.3 (6.6) |                |         |
| Mild to moderate              | 70.7 (2.2)      | 63.9 (1.4) | 60.5 (2.0) |                | 59.2 (1.0) | 52.6 (2.0) | 55.9 (6.7) |                |         |
| Heavy                         | 12.7 (1.7)      | 15.6 (1.0) | 20.6 (1.6) |                | 1.4 (0.2)  | 1.4 (0.5)  | 1.8 (1.3)  |                |         |
| Physical activity             | 39.9 (2.4)      | 43.9 (1.3) | 42.0 (2.0) | 0.301          | 39.4 (1.0) | 32.6 (2.0) | 24.0 (5.2) | < 0.001        |         |
| BMI groups, kg/m <sup>2</sup> |                 |            |            |                |            |            |            | < 0.001        | < 0.001 |
| < 18.5                        | 6.1 (1.2)       | 1.6 (0.3)  | 0.2 (0.1)  |                | 3.6 (0.4)  | 0.2 (0.1)  | 0.0 (0.0)  |                |         |
| ≥ 18.5–< 23                   | 50.5 (2.4)      | 24.8 (1.2) | 10.6 (1.2) |                | 47.3 (1.1) | 23.6 (1.7) | 8.0 (3.2)  |                |         |
| ≥ 23–< 25                     | 22.8 (2.1)      | 31.4 (1.3) | 25.3 (1.7) |                | 23.7 (0.8) | 21.6 (1.7) | 1.3 (0.8)  |                |         |
| ≥ 25–< 30                     | 20.6 (2.0)      | 39.9 (1.3) | 48.2 (2.0) |                | 24.1 (0.9) | 38.3 (1.8) | 30.2 (6.1) |                |         |
| ≥ 30                          | 0.0 (0.0)       | 2.3 (0.4)  | 15.8 (1.5) |                | 1.3 (0.2)  | 16.4 (1.4) | 60.5 (6.5) |                |         |
| Abdominal obesity             | 17.8 (1.9)      | 44.3 (1.2) | 65.2 (1.9) | < 0.001        | 29.3 (1.0) | 61.5 (1.9) | 89.7 (3.6) | < 0.001        |         |
| Diabetes mellitus             | 7.2 (1.3)       | 20.4 (1.1) | 32.0 (2.2) | < 0.001        | 11.5 (0.7) | 27.9 (1.7) | 40.7 (6.1) | < 0.001        |         |
| Hypertension                  | 2.5 (0.8)       | 40.0 (1.3) | 72.0 (1.9) | < 0.001        | 23.2 (0.9) | 78.3 (1.7) | 88.8 (4.4) | < 0.001        |         |
| Hypercholesterolemia          | 15.8 (1.9)      | 26.8 (1.2) | 37.9 (1.8) | < 0.001        | 29.7 (1.0) | 49.5 (2.0) | 49.5 (6.5) | < 0.001        |         |
| CKD                           | 0.5 (0.2)       | 3.9 (0.5)  | 4.1 (0.8)  | < 0.001        | 1.9 (0.3)  | 5.3 (0.9)  | 9.7 (3.8)  | < 0.001        |         |

**Supplementary Table 1. Continued**

| Characteristic                   | STOP-BANG score |             |             |                |             |             |             |                |
|----------------------------------|-----------------|-------------|-------------|----------------|-------------|-------------|-------------|----------------|
|                                  | Male            |             |             |                | Female      |             |             |                |
|                                  | 0-2             | 3-4         | 5-8         | <i>p</i> value | 0-2         | 3-4         | 5-8         | <i>p</i> value |
| Age, yr                          | 50.9 ± 0.5      | 57.4 ± 0.3  | 57.8 ± 0.4  | < 0.001        | 56.0 ± 0.3  | 63.2 ± 0.5  | 61.5 ± 1.2  | < 0.001        |
| Height, cm                       | 170.8 ± 0.3     | 170.0 ± 0.2 | 170.0 ± 0.2 | 0.065          | 157.4 ± 0.1 | 155.2 ± 0.2 | 157.4 ± 0.7 | < 0.001        |
| Weight, kg                       | 82.6 ± 0.4      | 89.0 ± 0.2  | 94.0 ± 0.4  | < 0.001        | 80.4 ± 0.2  | 88.3 ± 0.4  | 97.9 ± 1.3  | < 0.001        |
| BMI, kg/m <sup>2</sup>           | 22.7 ± 0.1      | 24.6 ± 0.1  | 26.6 ± 0.1  | < 0.001        | 23.2 ± 0.1  | 26.0 ± 0.2  | 30.1 ± 0.5  | < 0.001        |
| Waist circumference, cm          | 82.6 ± 0.4      | 89.0 ± 0.2  | 94.0 ± 0.4  | < 0.001        | 80.4 ± 0.2  | 88.3 ± 0.4  | 97.9 ± 1.3  | < 0.001        |
| Fasting glucose, mg/dL           | 100.1 ± 0.9     | 107.5 ± 0.7 | 112.2 ± 1.3 | < 0.001        | 99.1 ± 0.4  | 106.0 ± 0.8 | 111.0 ± 3.6 | < 0.001        |
| Systolic BP, mmHg                | 115.1 ± 0.6     | 122.4 ± 0.4 | 127.3 ± 0.6 | < 0.001        | 117.6 ± 0.4 | 131.3 ± 0.8 | 130.6 ± 1.8 | < 0.001        |
| Diastolic BP, mmHg               | 75.8 ± 0.4      | 78.8 ± 0.3  | 81.9 ± 0.5  | < 0.001        | 74.5 ± 0.2  | 77.6 ± 0.4  | 81.0 ± 1.2  | < 0.001        |
| Total cholesterol, mg/dL         | 195.1 ± 1.8     | 191.1 ± 1.0 | 189.4 ± 1.8 | 0.065          | 199.6 ± 0.9 | 189.4 ± 1.5 | 190.8 ± 5.3 | < 0.001        |
| LDL-C, mg/dL                     | 117.7 ± 1.7     | 113.6 ± 0.9 | 111.2 ± 1.6 | 0.016          | 121.2 ± 0.8 | 112.4 ± 1.3 | 111.9 ± 4.9 | < 0.001        |
| HDL-C, mg/dL                     | 49.7 ± 0.6      | 46.9 ± 0.3  | 46.4 ± 0.4  | < 0.001        | 56.0 ± 0.3  | 52.0 ± 0.5  | 48.3 ± 1.2  | < 0.001        |
| eGFR, mL/min/1.73 m <sup>2</sup> | 96.2 ± 0.8      | 90.4 ± 0.5  | 90.0 ± 0.8  | < 0.001        | 97.2 ± 0.5  | 91.9 ± 0.9  | 92.7 ± 2.9  | < 0.001        |

Values are presented as percentage (standard error) or mean ± standard error.

BMI, body mass index; CKD, chronic kidney disease; BP, blood pressure; LDL-C, low-density lipoprotein cholesterol; HDL-C, high-density lipoprotein cholesterol; eGFR, estimated glomerular filtration rate.
